# Supplementary material
Source: PubMed Central journal article supplement (PMC11018467)
Supplement: NIHMS1968074-supplement-1.pdf [file NIHMS1968074-supplement-1.pdf]

# Figure S1

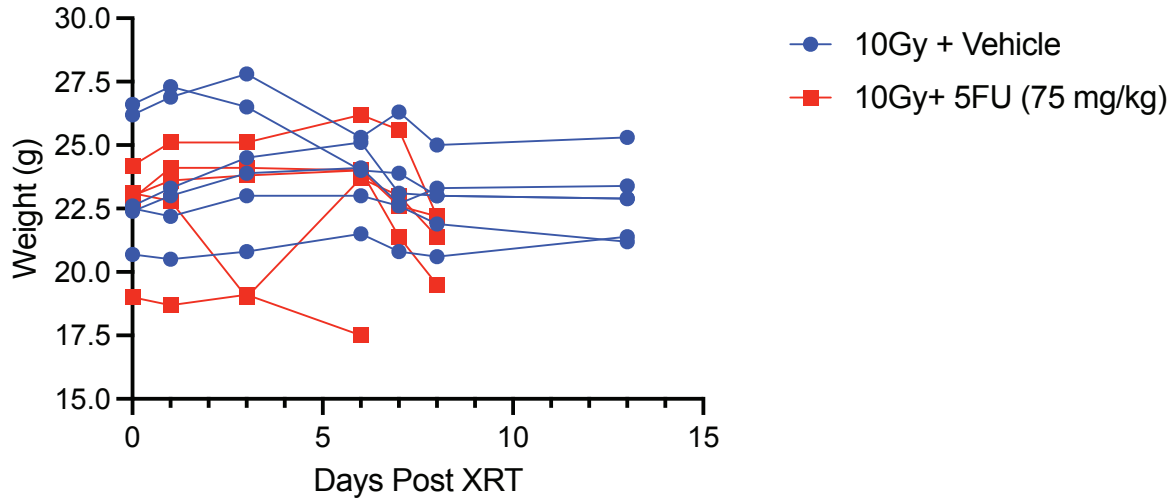

**Supplemental Figure 1. 5FU at 75mg/kg in combination with 10Gy radiation is too toxic in vivo.** A limited study with MAF-811 intracranial in vivo model was given 75mg/kg 5FU i.p. at the onset and final day of 2Gy x 5 day focal radiation. Weights were monitored daily for 5 days and then every 3 days for 2 weeks total. Red denotes mice treated with 5FU and blue denotes mice treated with vehicle control. All 5FU treated mice died within 10 days of chemo-and radio-therapy.
