# Supplementary material
Source: PubMed Central journal article supplement (PMC11018467)
Supplement: NIHMS1968074-supplement-2.pdf [file NIHMS1968074-supplement-2.pdf]

Figure S2

A

|         |         | 5FU (uM) |      |      |      |      |      |
|---------|---------|----------|------|------|------|------|------|
|         |         | 0        | 0.63 | 1.25 | 2.5  | 5    | 10   |
| MAF-811 |         | 1.25     | 0.81 | 0.87 | 0.94 | 0.84 | 0.60 |
|         |         | 2.5      | 0.62 | 0.77 | 0.86 | 1.05 | 0.60 |
|         | RT (Gy) | 5        | 2.42 | 2.19 | 2.58 | 1.74 | 1.24 |
|         |         | 10       | 1.27 | 0.87 | 0.76 | 0.45 | 0.38 |
|         |         | 20       | 0.91 | 0.48 | 0.47 | 0.20 | 0.00 |
|         |         | 5FU (uM) |      |      |      |      |      |
|         |         | 0        | 0.63 | 1.25 | 2.5  | 5    | 10   |
| MAF-928 |         | 1.25     | 2.75 | 0.58 | 0.73 | 0.91 | 1.15 |
|         |         | 2.5      | 0.58 | 0.79 | 0.72 | 0.96 | 1.25 |
|         | RT (Gy) | 5        | 0.90 | 0.63 | 0.91 | 0.85 | 1.00 |
|         |         | 10       | 0.97 | 1.01 | 0.77 | 0.92 | 0.81 |
|         |         | 20       | 1.05 | 0.97 | 0.71 | 0.80 | 0.48 |

B

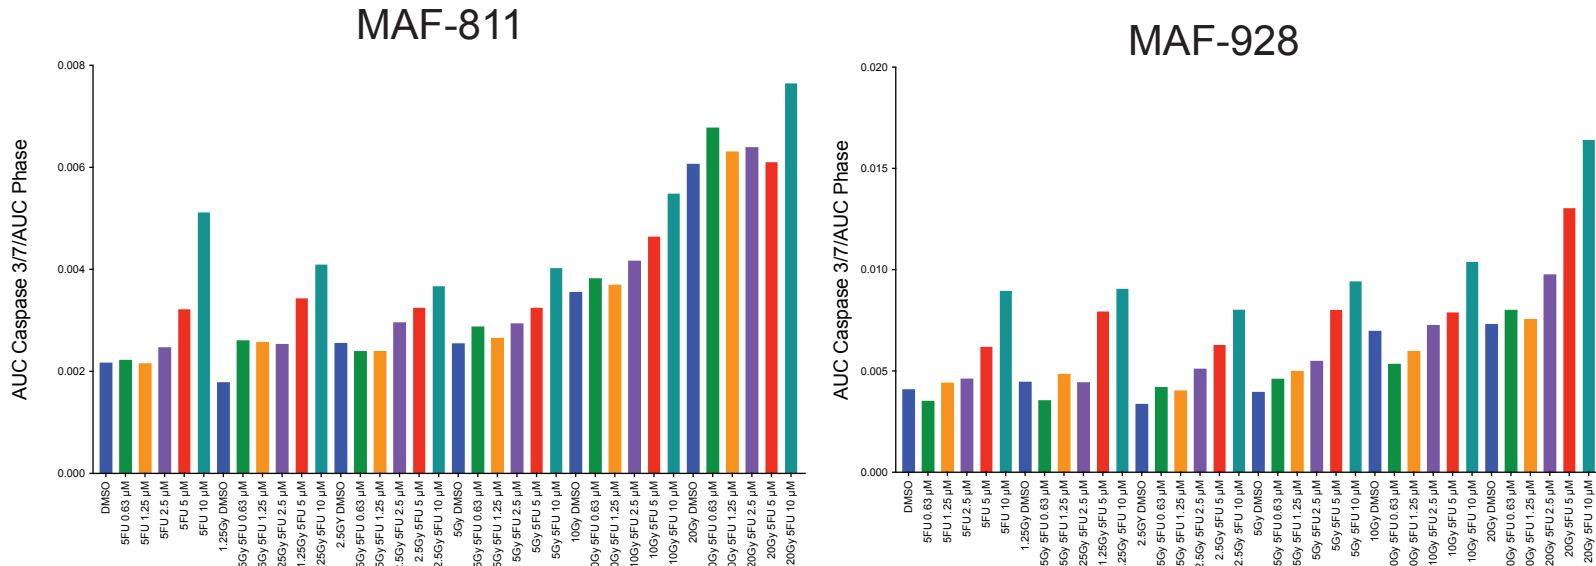

**Supplemental Figure 2. Combination of radiation with 5FU is synergistic in 1q+ PFA cell lines.** A. Synergy calculations from proliferation area under the curve values after 10 days of radiation and 5FU treatments. The combination index was calculated by the Chou-Talalay equation, which takes into account both the potency (IC50) and shape of the dose-effect curve (the M-value). Combination index values less than 1, equal to 1, and more than 1 indicate synergism, additive effect, and antagonism, respectively. B. Cleaved caspase3/7 counts were taken every 4 hours during the proliferation experiment. The area under the curve (AUC) was calculated for both cleaved caspase 3/6 counts and phase confluency after 10 days for growth. AUC caspase was normalized to AUC phase to account for change in number of cells over time.
