# Supplementary material
Source: PubMed Central journal article supplement (PMC11018467)
Supplement: NIHMS1968074-supplement-3.pdf [file NIHMS1968074-supplement-3.pdf]

**Figure S3**

MAF-811

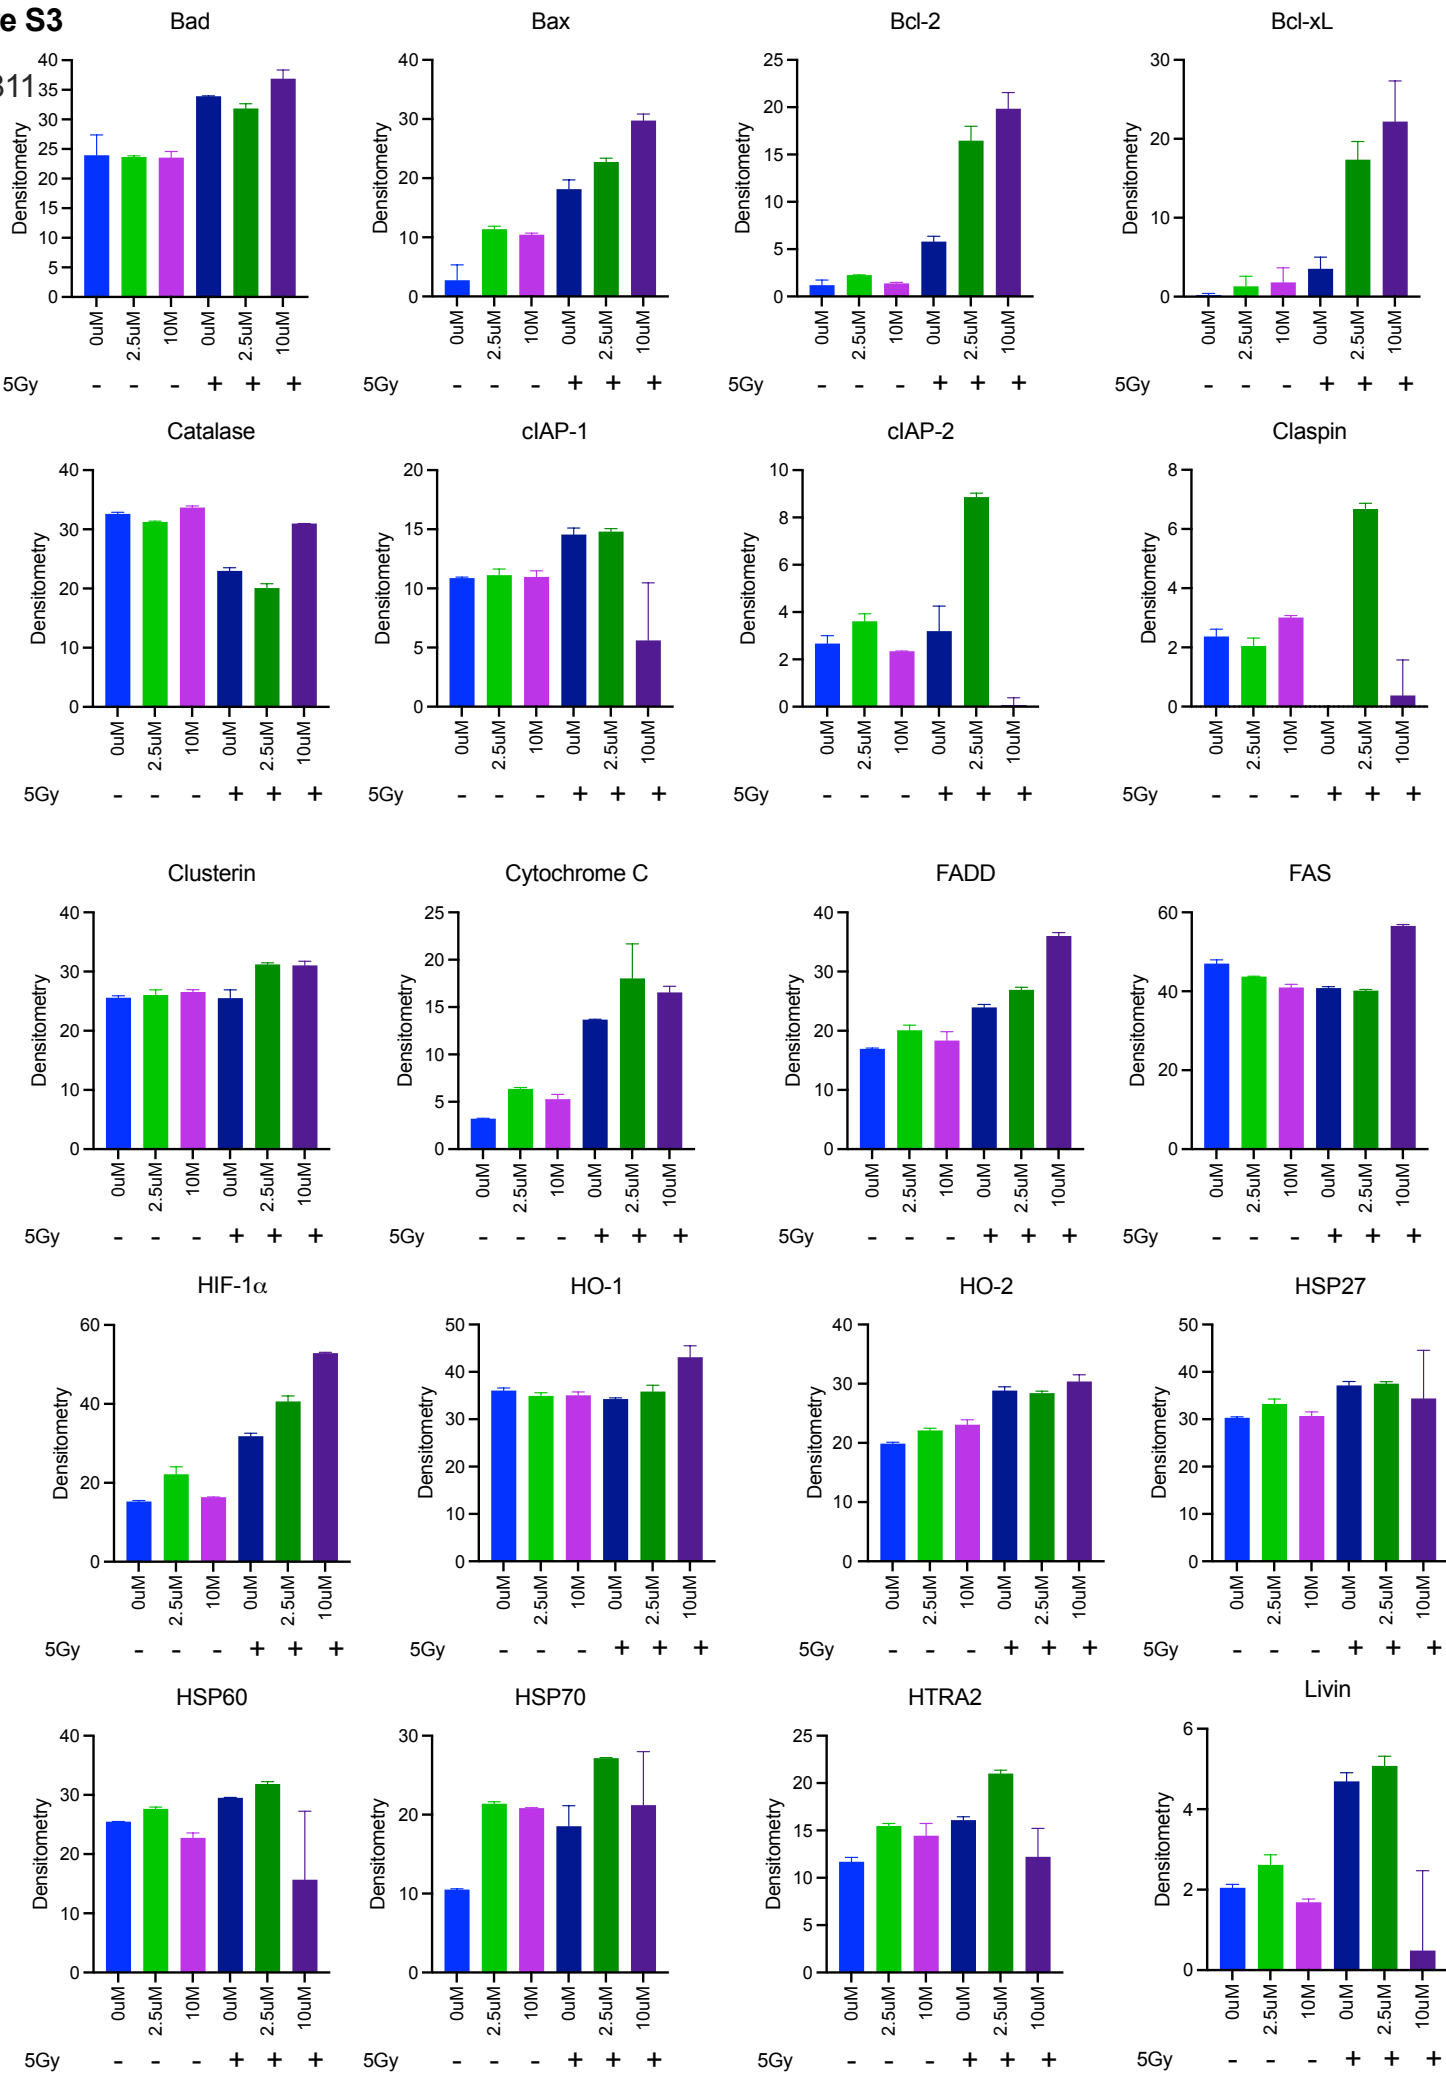

# MAF-811

p27

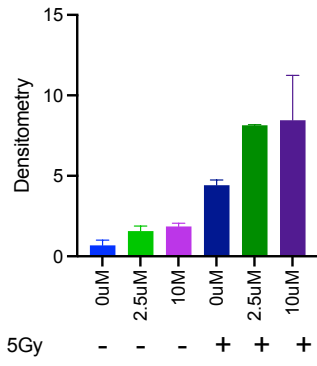

p-RAD17 (S635)

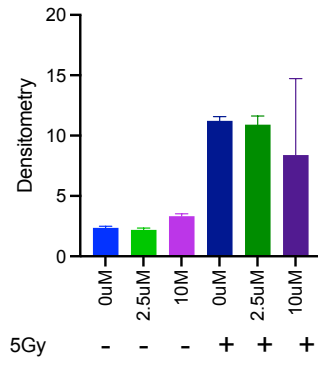

PON2

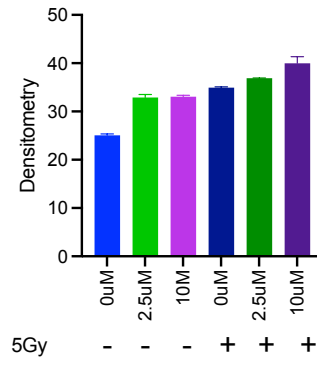

Pro-Caspase 3

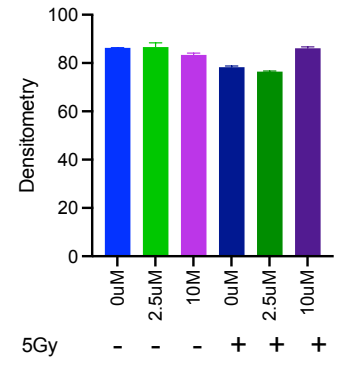

SMAC/Diablo

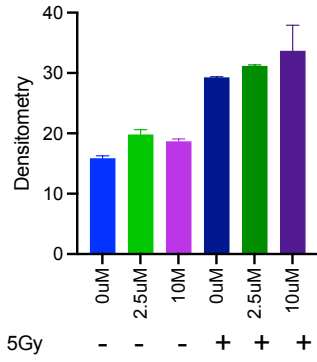

Survivin

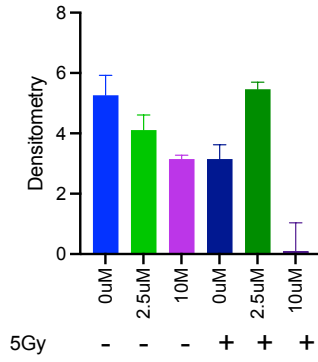

TNFR1

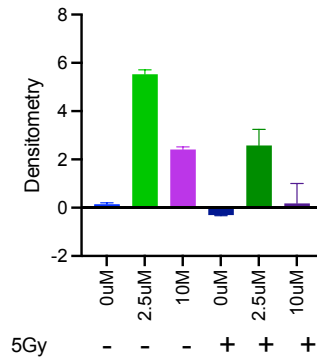

TRAIL R1/DR4

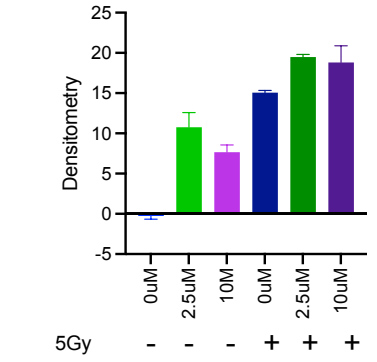

TRAIL R1/DR5

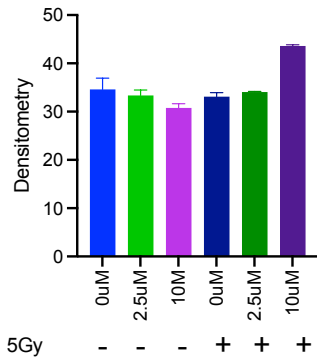

XIAP

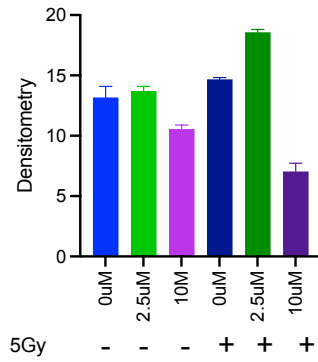

MAF-928

Bad

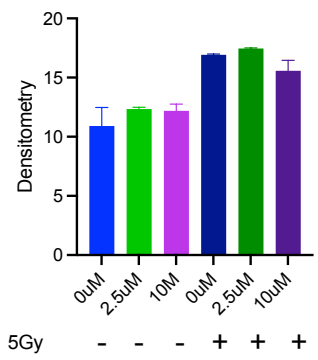

Bax

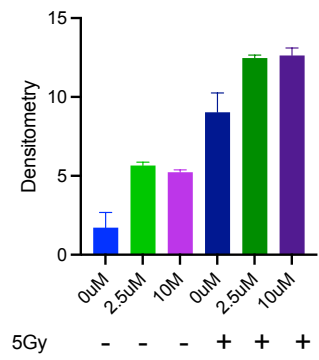

Bcl-2

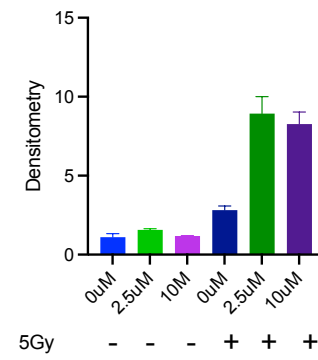

Bcl-xL

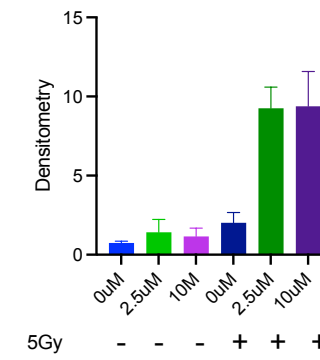

Catalase

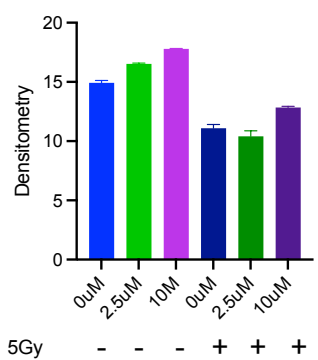

cIAP-1

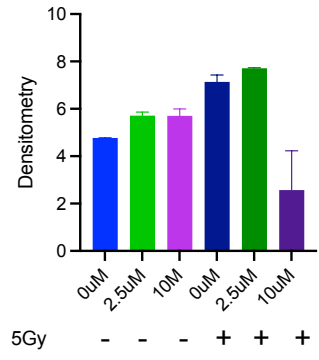

cIAP-2

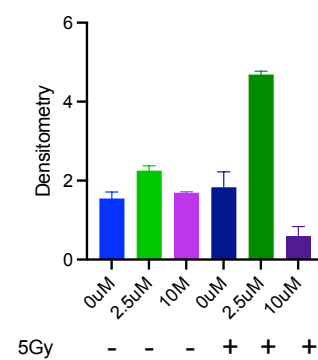

Claspin

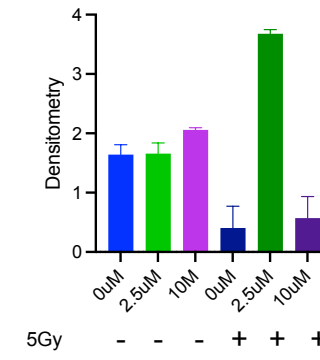

Clusterin

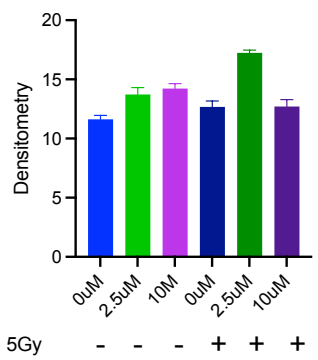

Cytochrome C

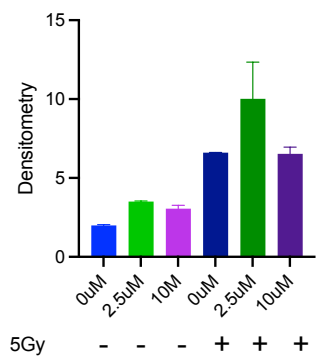

FADD

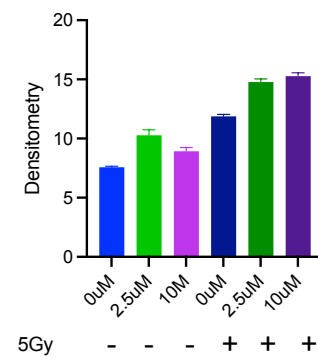

FAS

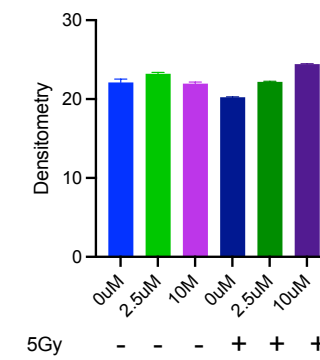

HIF-1α

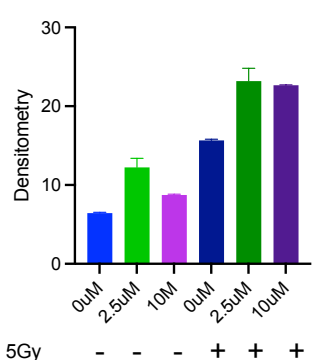

HO-1

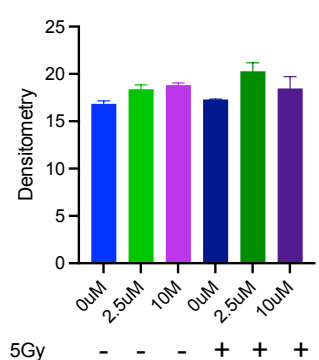

HO-2

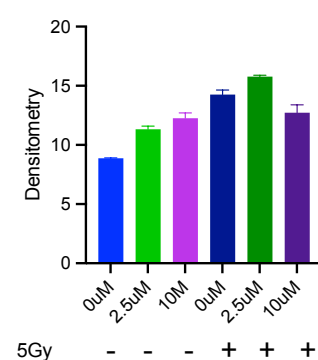

HSP27

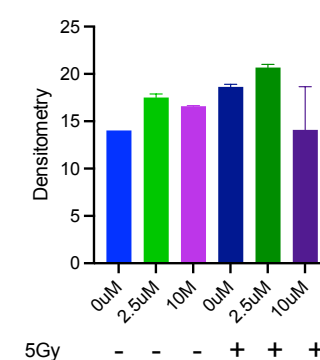

HSP60

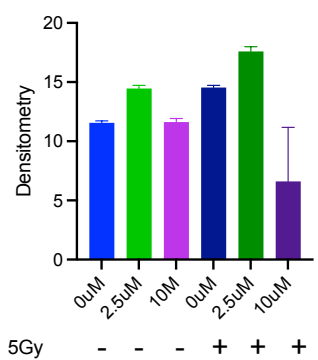

HSP70

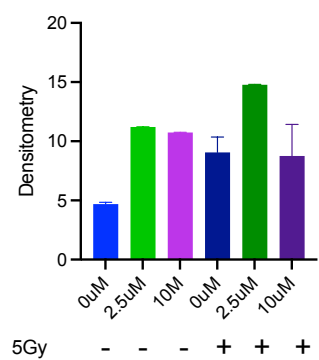

HTRA2

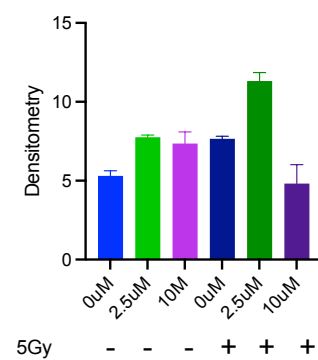

Livin

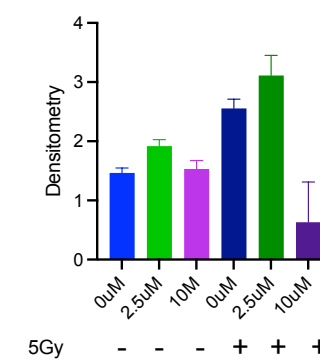

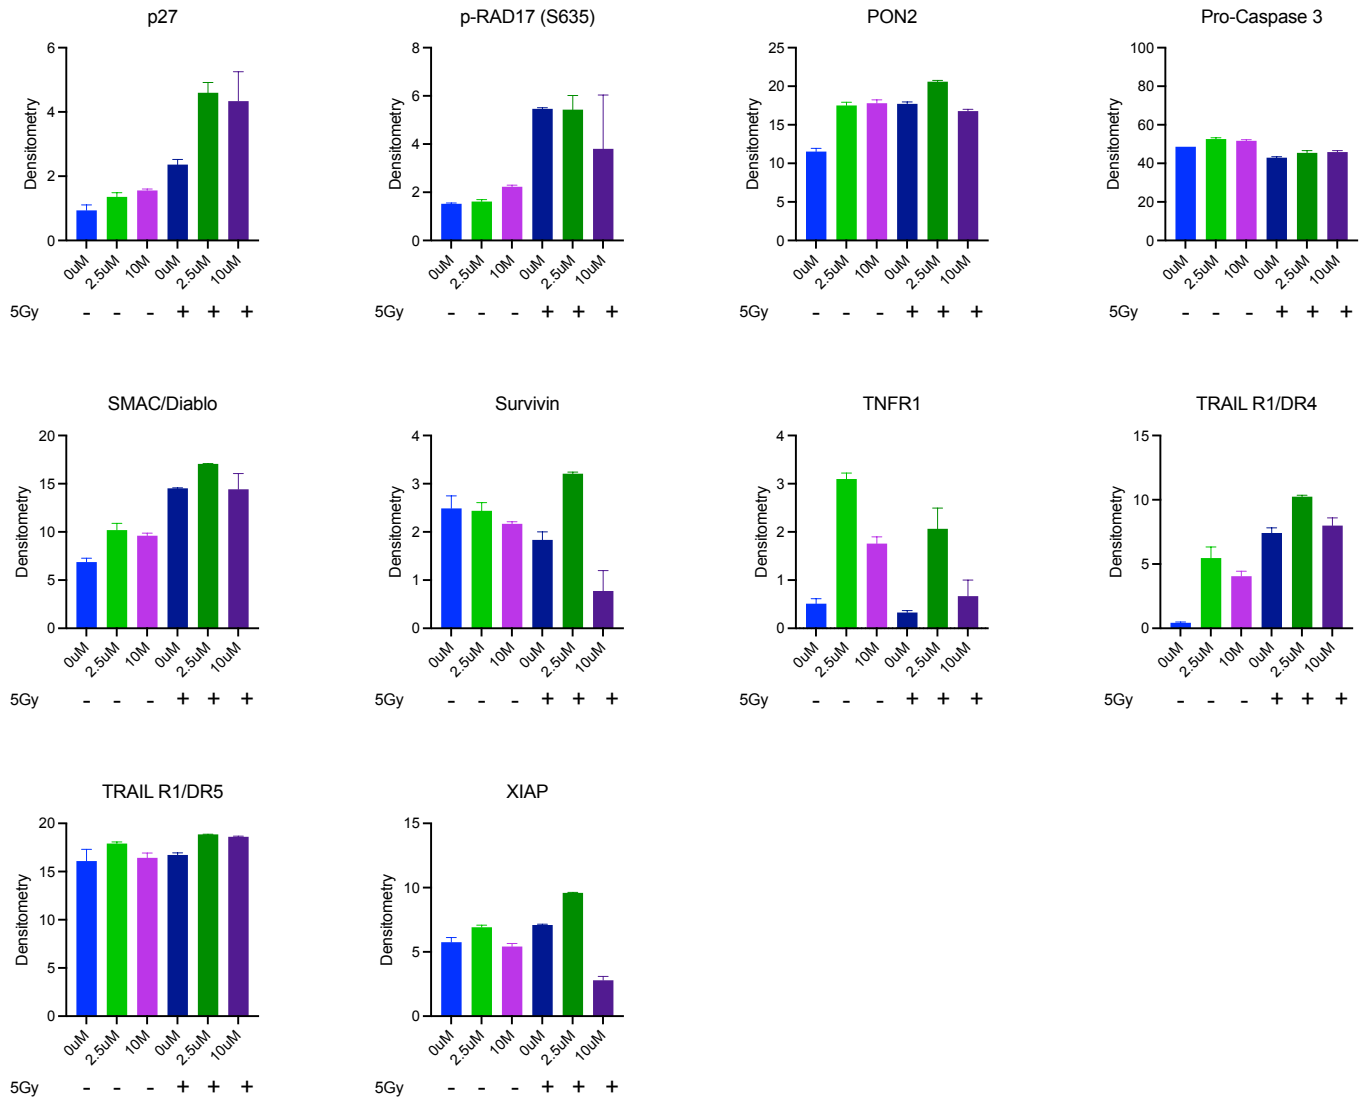

**Supplement Figure 3. Densitometry for apoptosis proteomic array of 1q+ PFA cell lines treated with 5FU and 5Gy radiation.** Densitometry calculated by normalizing pixel intensity of protein of interest to the positive proteins on proteomic array.
