# Supplementary material
Source: PubMed Central journal article supplement (PMC11018467)
Supplement: NIHMS1968074-supplement-4.pdf [file NIHMS1968074-supplement-4.pdf]

# Figure S4

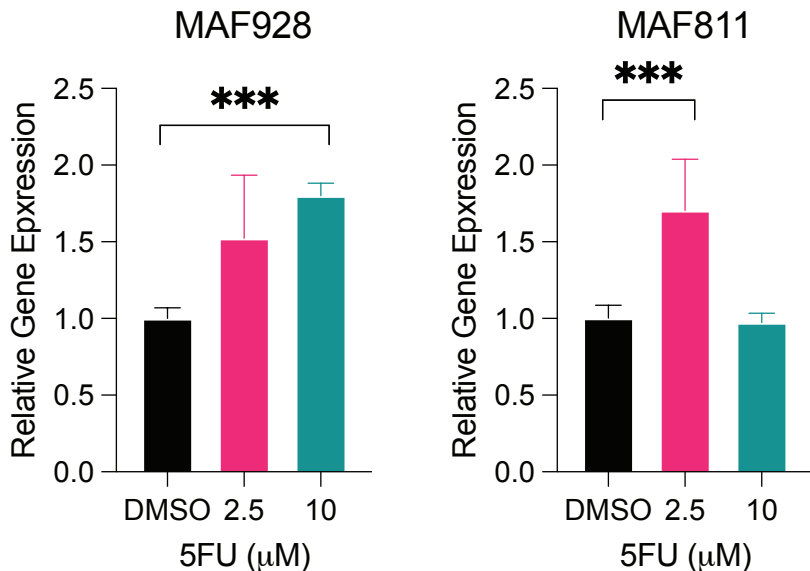

**Supplemental Figure 4 MDM4 gene expression with 5FU treatment.** qRT-PCR gene expression of MDM4 following 72 hours of 5FU treatment in MAF928 and MAF811 cell lines. \*\*\* denotes p-value < 0.0001.
