# Supplementary material
Source: PubMed Central journal article supplement (PMC11018467)
Supplement: NIHMS1968074-supplement-5.pdf [file NIHMS1968074-supplement-5.pdf]

Figure S5

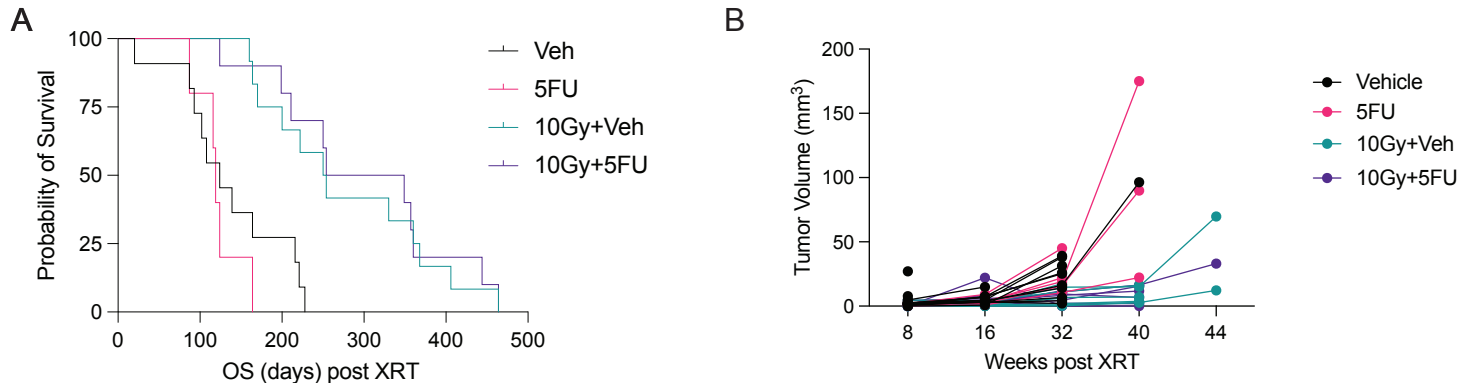

**Supplemental Figure 5. MAF-811\_XC in vivo survival with radiation and chemotherapy.** MAF-811 patient derived xenograft cells were injected into the 4th ventricle of NSG mice. 4 months following injections, mice were randomized to treatment groups. 5FU was given the day before radiation and the final day of radiation treatments. Radiation was stereotactically delivered to the posterior fossa in 2Gy fractions for a total of 10Gy. Mice were given 2 week recovery period before chemotherapy resumed. 5FU was given once weekly through IP injections. ATRA was given daily for 5 days through oral gavage. Mice were given 6 weeks of treatment. **A.** Kaplan Meier survival curve for 5FU with and without radiation treatment. **B.** Tumor volumetrics of 5FU treated mice with and without radiation.
