# Supplementary material
Source: PubMed Central journal article supplement (PMC11018467)
Supplement: NIHMS1968074-supplement-6.pdf [file NIHMS1968074-supplement-6.pdf]

Figure S6

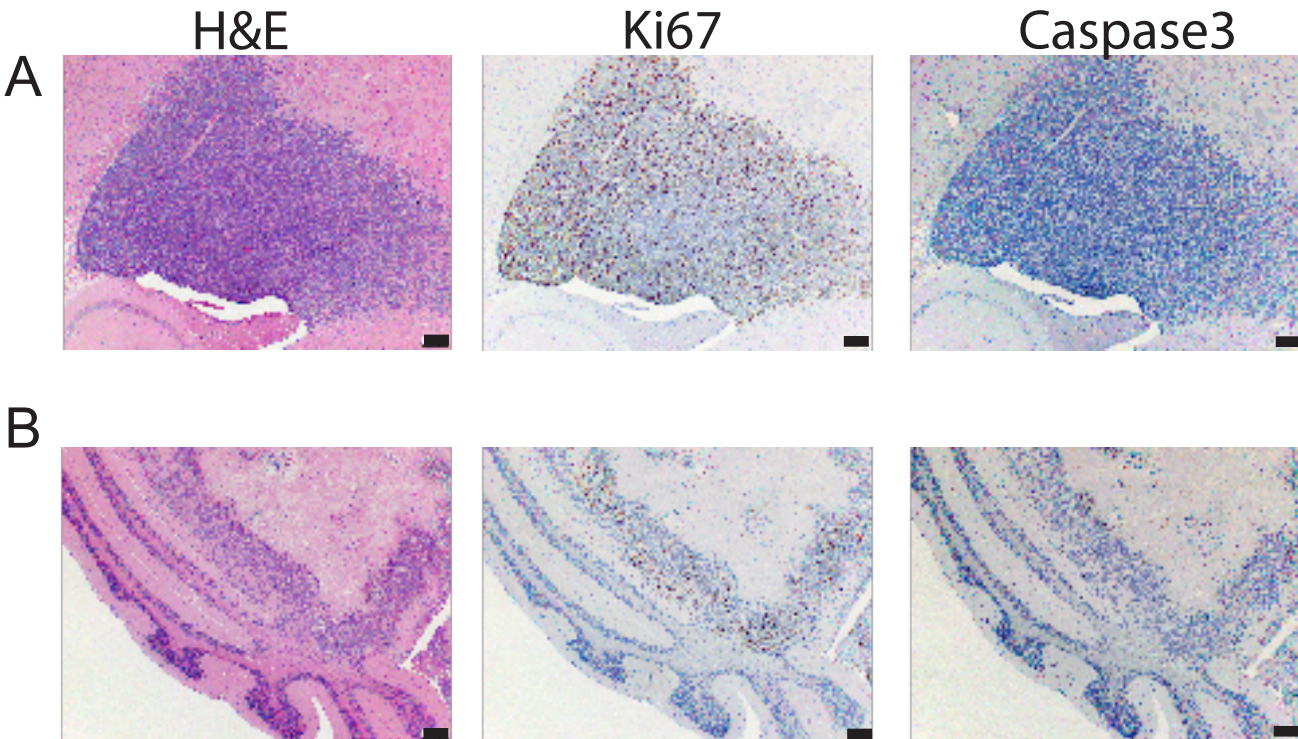

**Supplemental Figure 6. MAF-928 in vivo mice had more metastatic lesions with radiation alone.** A. H&E, Ki67, Caspase 3 scans of metastatic lesion in the olfactory bulb of mouse treated with radiation alone. Met has almost no necrosis with highly proliferative dense cells. B. H&E, Ki67, Caspase 3 from the same mouse with posterior fossa recurrence following radiation treatment. The posterior fossa recurrence has a larger necrotic core with highly proliferative cells on around the edges. Black bar denotes scale of 200  $\mu\text{m}$ .
