# Supplementary material
Source: PubMed Central journal article supplement (PMC11018467)
Supplement: NIHMS1968074-supplement-7.pdf [file NIHMS1968074-supplement-7.pdf]

Figure S7

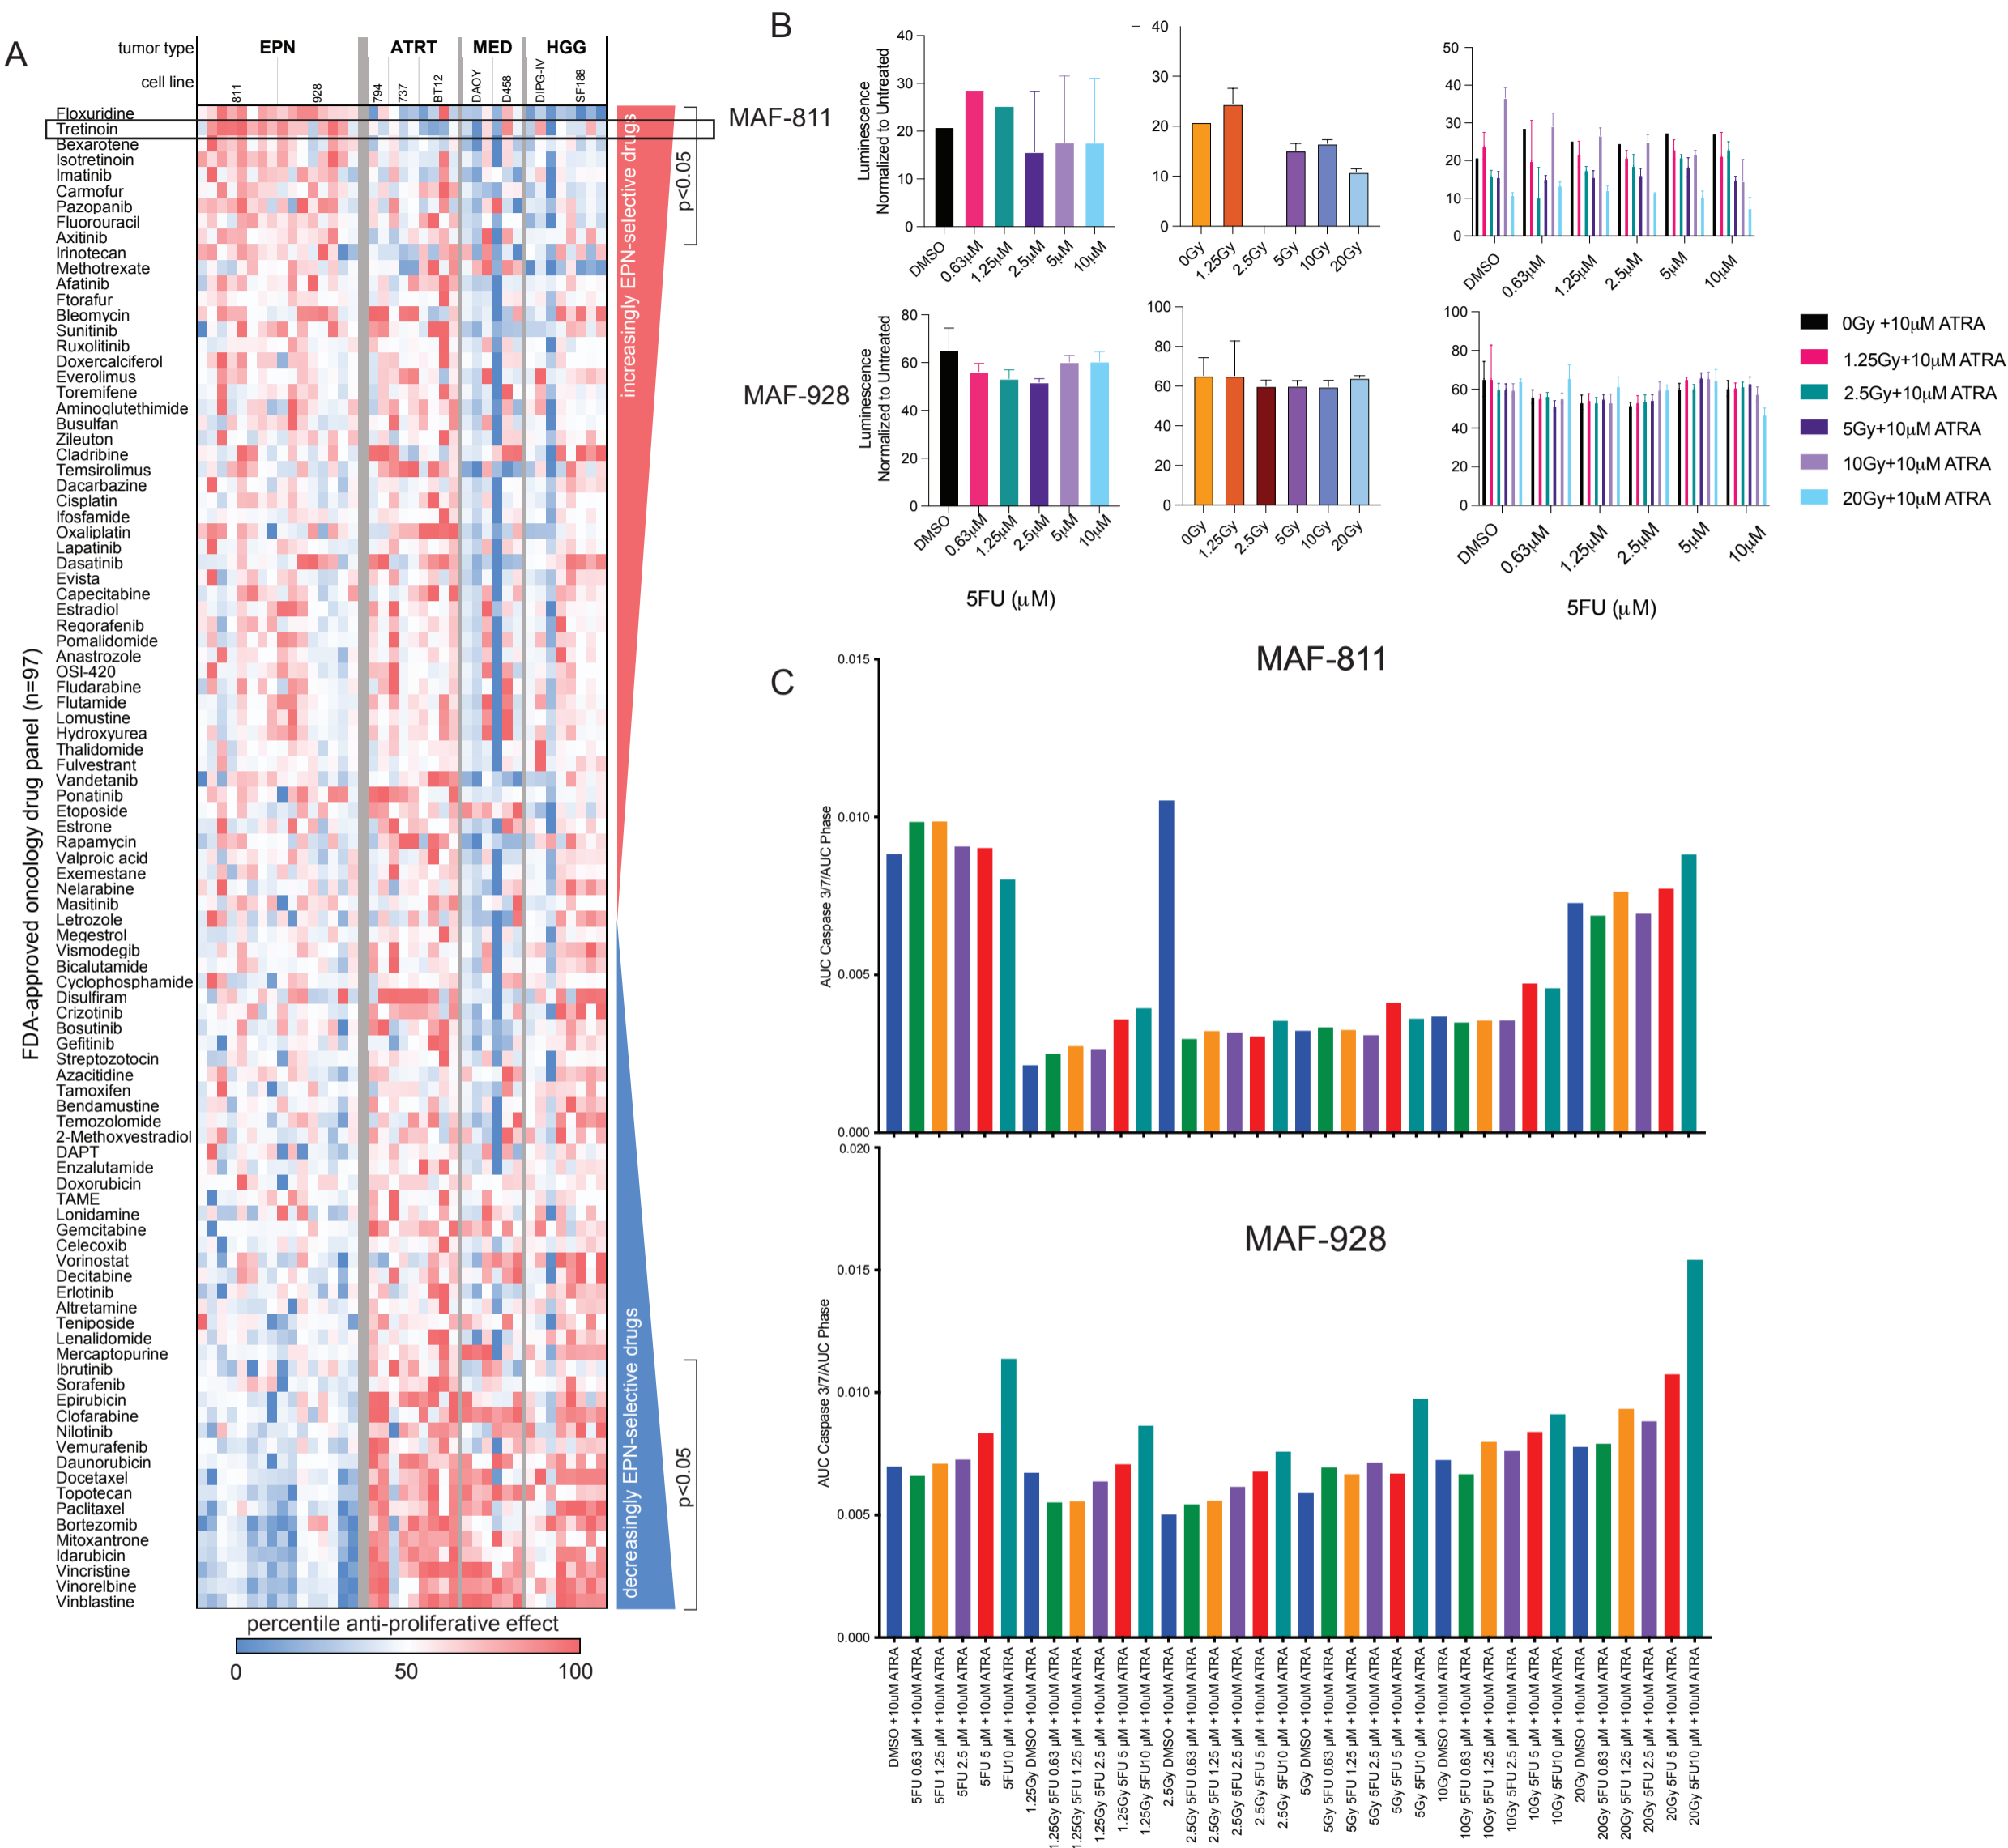

**Supplement Figure 7 Tretinoin (ATRA) identified as an EPN specific target.** A. FDA drug screen results from EPN cell lines compared with other pediatric brain tumor cell lines. B. Cleaved caspase 3/7 counts from in vitro proliferation assays with combination radiation, 5FU and ATRA. Cell viability measured using Cell Titer Glo 10 days following combination radiation, 5FU and ATRA.
