# Supplementary material
Source: PubMed Central journal article supplement (PMC11018467)
Supplement: NIHMS1968074-supplement-8.pdf [file NIHMS1968074-supplement-8.pdf]

Figure S8

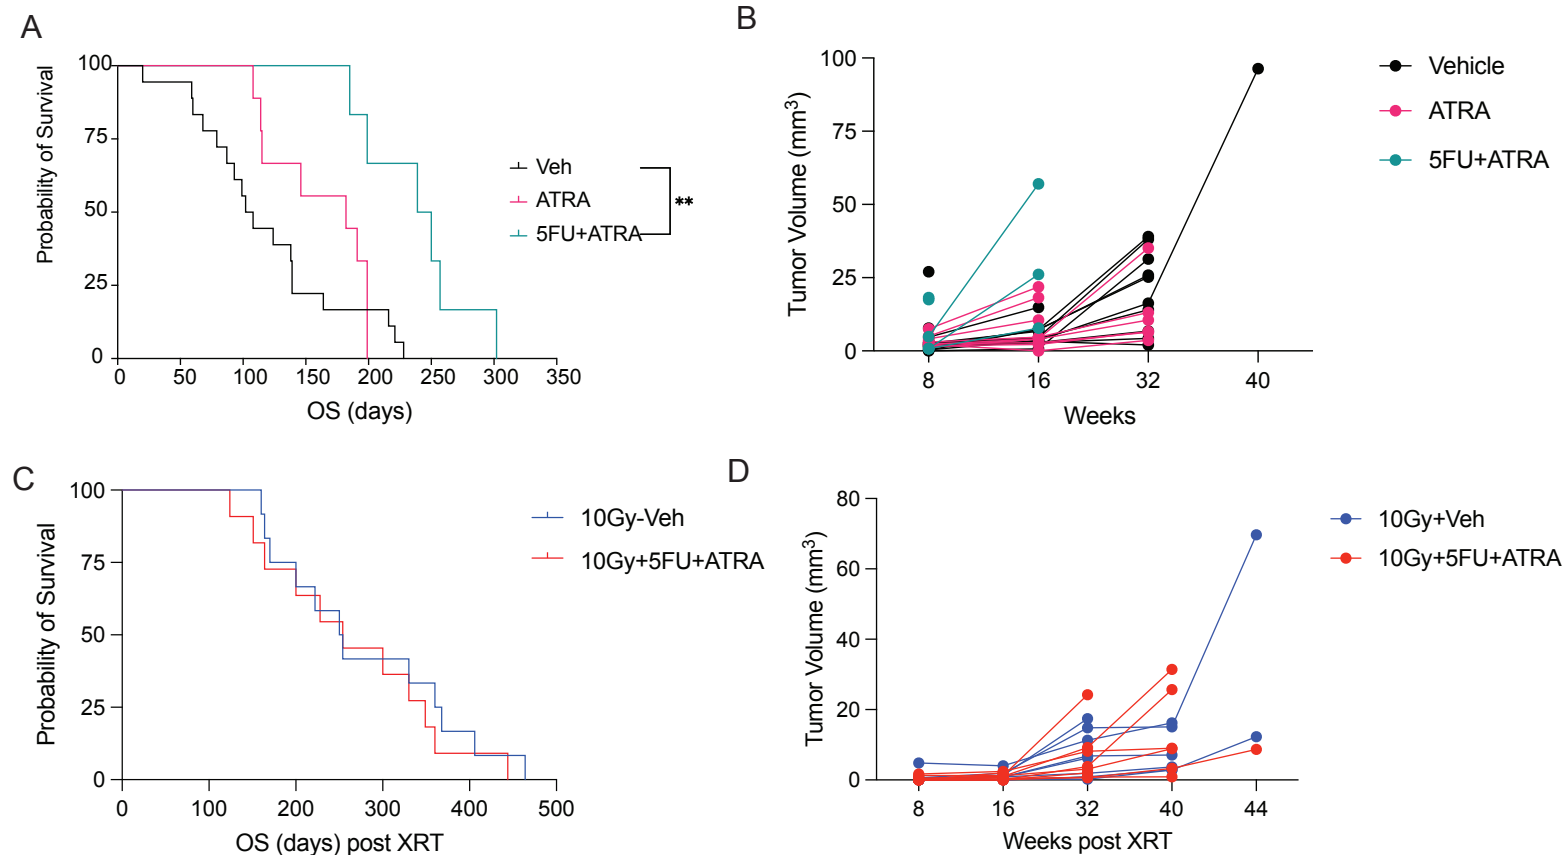

**Supplemental Figure 8. MAF-811\_XC in vivo survival with radiation and chemotherapy.** MAF-811 patient derive xenograft cells were injected into the 4th ventricle of NSG mice. 4 months following injections, mice were randomized to treatment groups. 5FU was given the day before radiation and the final day of radiation treatments. Radiation was stereotactically delivered to the posterior fossa in 2Gy fractions for a total of 10Gy. Mice were given 2 week recovery period before chemotherapy resumed. 5FU was given once weekly through IP injections. ATRA was given daily for 5 days through oral gavage. Mice were given 6 weeks of treatment. **A.** Kaplan Meier survival curve for mice given ATRA or 5FU+ATRA. \*\* denotes p-value <0.01. **B.** Tumor volumetrics for mice treated with ATRA or combination 5FU+ATRA. **C.** Kaplan Meier survival curve for mice treated with 10Gy radiation or 10Gy radiation with 5FU followed by a single 6-week cycle of 5FU+ATRA. **D.** Tumor volumetrics for radiation treated mice with radiation and combination chemotherapy.
